# Supplementary material for: Temperature Influences the Production and Transport of Saxitoxin and the Expression of sxt Genes in the Cyanobacterium Aphanizomenon gracile
Source: Toxins (Basel). 2017 Oct 13;9(10):322. doi: 10.3390/toxins9100322 (PMC5666369; doi:10.3390/toxins9100322)
Supplement: Supplementary file 1 [file toxins-09-00322-s001.pdf]

## Supplementary Materials: Temperature Influences the Production and Transport of Saxitoxin and the Expression of *sxt* Genes in the Cyanobacterium *Aphanizomenon gracile*

Samuel Cirés, Adrián Delgado, Miguel González-Pleiter and Antonio Quesada

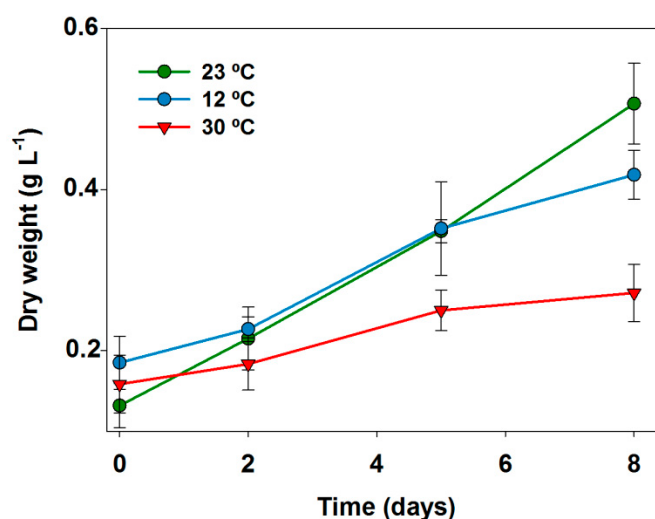

**Figure S1.** Growth curves of *Aphanizomenon gracile* UAM529 under three different temperatures. Error bars indicate standard deviation of three replicates ( $n = 3$ ).

**Table S1.** Flow cytometry analysis of membrane integrity and membrane potential in *Aphanizomenon gracile* UAM529 under three different temperatures. Results are expressed as relative fluorescence units (average  $\pm$  standard deviation) setting 23 °C as 100% to facilitate comparison. Asterisks indicate significant differences respective to 23 °C ( $p < 0.05$ ; one-way ANOVA). PI (propidium iodide) and DiBAC4(3) (DiBAC<sub>4</sub>(3) (Bis-(1,3-Dibutylbarbituric Acid)Trimethine Oxonol) are fluorescent dyes for membrane permeability and membrane potential, respectively.

| Temperature<br>(°C) | Average value of medians ( $n = 6$ ) |                  |
|---------------------|--------------------------------------|------------------|
|                     | PI                                   | DiBAC4(3)        |
| 23                  | 100.0 $\pm$ 0.4                      | 100.0 $\pm$ 16.6 |
| 12                  | 101.2 $\pm$ 0.1                      | 89.1 $\pm$ 12.0  |
| 30                  | 100.2 $\pm$ 1.7                      | 12.6 $\pm$ 2.7*  |

**Table S2.** Flow cytometry analysis of membrane integrity and membrane potential in *Aphanizomenon gracile* UAM529 under two different culture media with combined nitrogen (BG11) and without combined nitrogen (BG11<sub>0</sub>). Results are expressed as relative fluorescence units (average  $\pm$  standard deviation) setting BG11 as 100% to facilitate comparison. Asterisks indicate significant differences respective to BG11 ( $p < 0.05$ ; t test). PI (propidium iodide) and DiBAC4(3) (Bis-(1,3-Dibutylbarbituric Acid)Trimethine Oxonol) are fluorescent dyes for membrane permeability and membrane potential, respectively.

| Culture<br>medium | Average value of medians ( $n = 6$ ) |                 |
|-------------------|--------------------------------------|-----------------|
|                   | PI                                   | DiBAC4(3)       |
| BG11              | 100.0 $\pm$ 16.6                     | 100.0 $\pm$ 0.4 |
| BG11 <sub>0</sub> | 95.5 $\pm$ 2.2*                      | 74.2 $\pm$ 5.1* |
